# Supplementary material for: Dispersion of single-walled carbon nanotubes by DNA for preparing transparent conductive films
Source: Royal Society of Chemistry journal article supplement (doi:10.1039/c0jm00670j), 2010-01-01
Supplement: c0jm00670j.pdf [file c0jm00670j.pdf]

## Supplementary Information

### **Dispersion of Single-Walled Carbon Nanotubes by DNA for Preparing Transparent Conductive Films**

*Ranran Wang, Jing Sun\*, Lian Gao\* and Jing Zhang*

*The State Key Lab of High Performance Ceramics and Superfine Microstructure,  
Shanghai Institute of Ceramics, Chinese Academy of Sciences, 1295 Ding Xi Road,  
Shanghai 200050, China*

*E-mail address: [jingsun@mail.sic.ac.cn](mailto:jingsun@mail.sic.ac.cn) (J. Sun), [liangao@mail.sic.ac.cn](mailto:liangao@mail.sic.ac.cn) (L. Gao);*

*Tel: +86-12-52412718. Fax: +86-21-52413122*

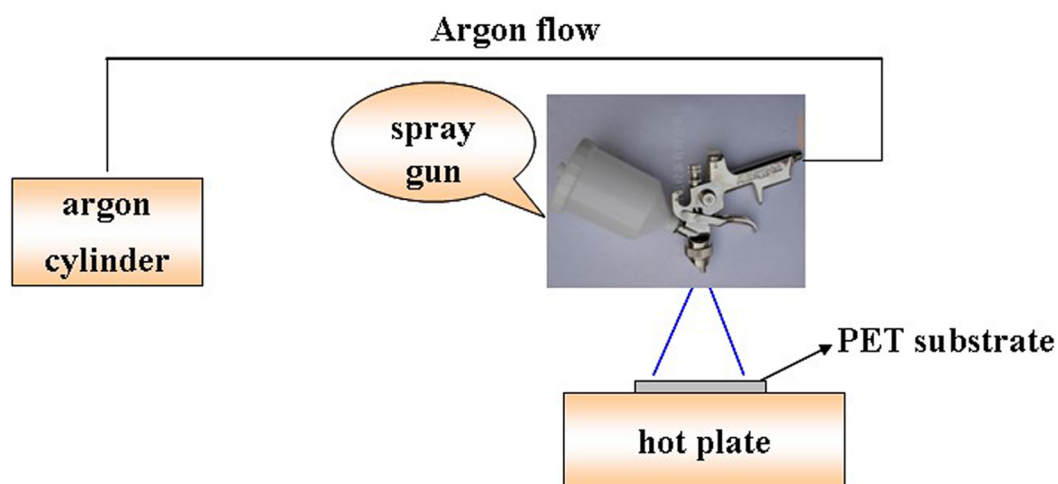

S1 Sketch map of spray coating instrument

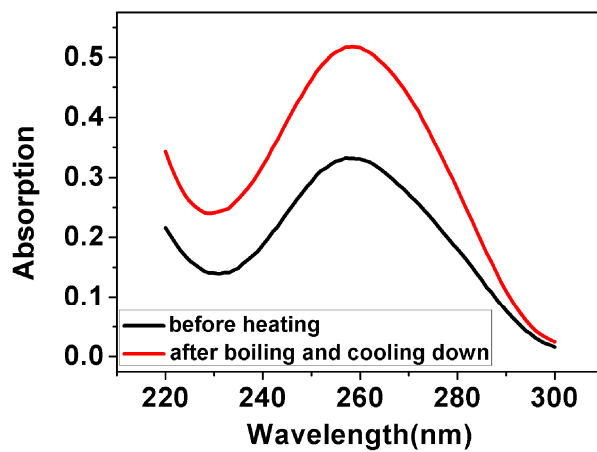

S2 Absorbance spectra of 0.2 mg/mL DNA solutions before heating and after being boiling and cooling down
